# Supplementary material for: A Qualitative and Quantitative Occupational Exposure Risk Assessment to Hazardous Substances during Powder-Bed Fusion Processes in Metal-Additive Manufacturing
Source: MDPI journal article supplement (doi:10.3390/safety8020032), 2022-04-20
Supplement: s1 [file s1]

# Supplementary Materials: A Qualitative and Quantitative Occupational Exposure Risk Assessment to Hazardous Substances during Powder-Bed Fusion Processes in Metal Additive Manufacturing

Stefano Dugheri, Giovanni Cappelli, Lucia Trevisani, Simon Kemble, Fabrizio Paone, Massimiliano Rigacci, Elisabetta Bucaletti, Donato Squillaci, Nicola Mucci and Giulio Arcangeli

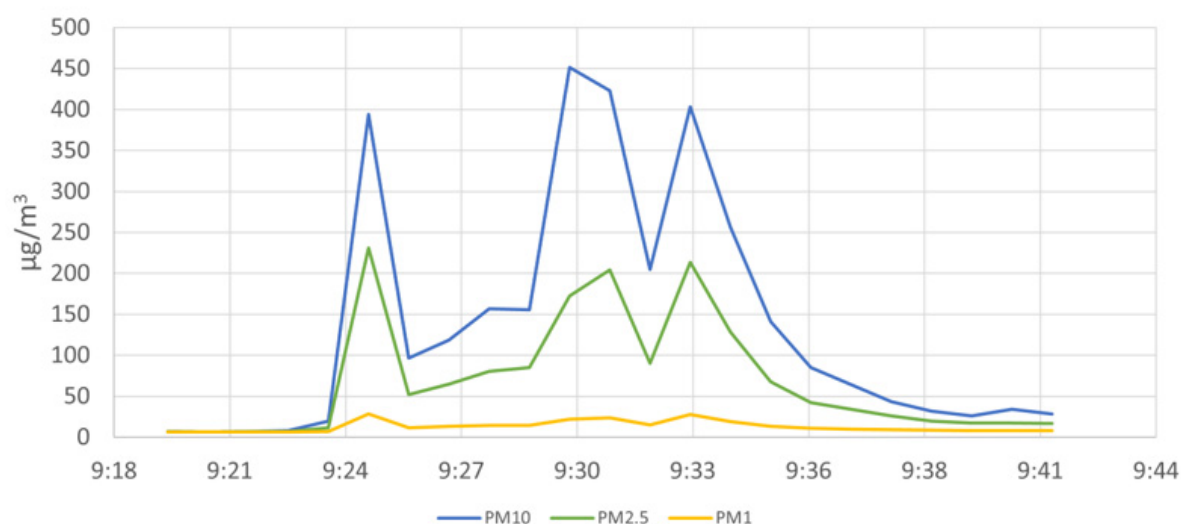

Figure S1. Particulate matter fractions for O1.

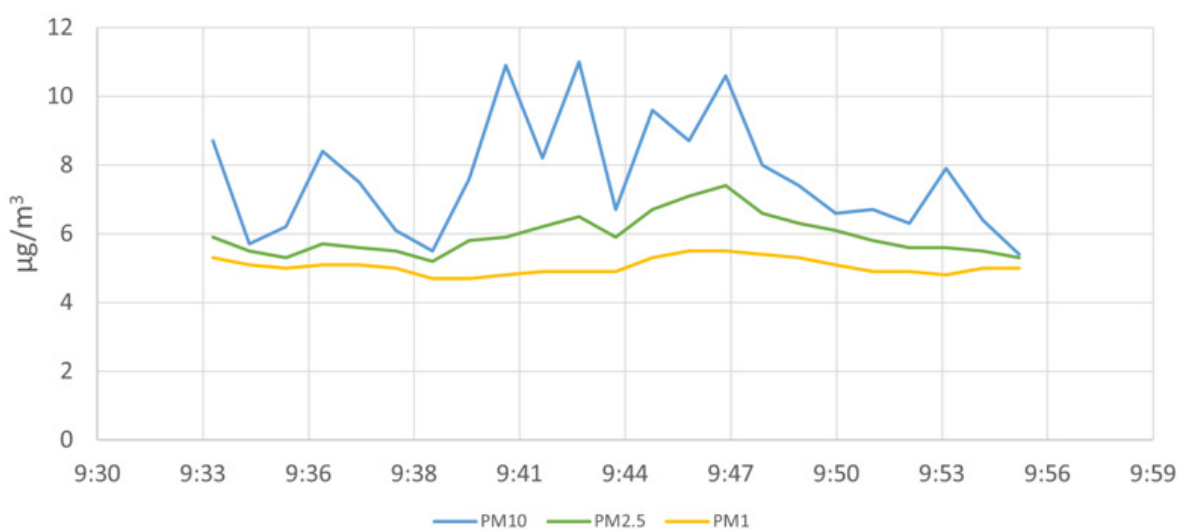

Figure S2. Particulate matter fractions for O2.

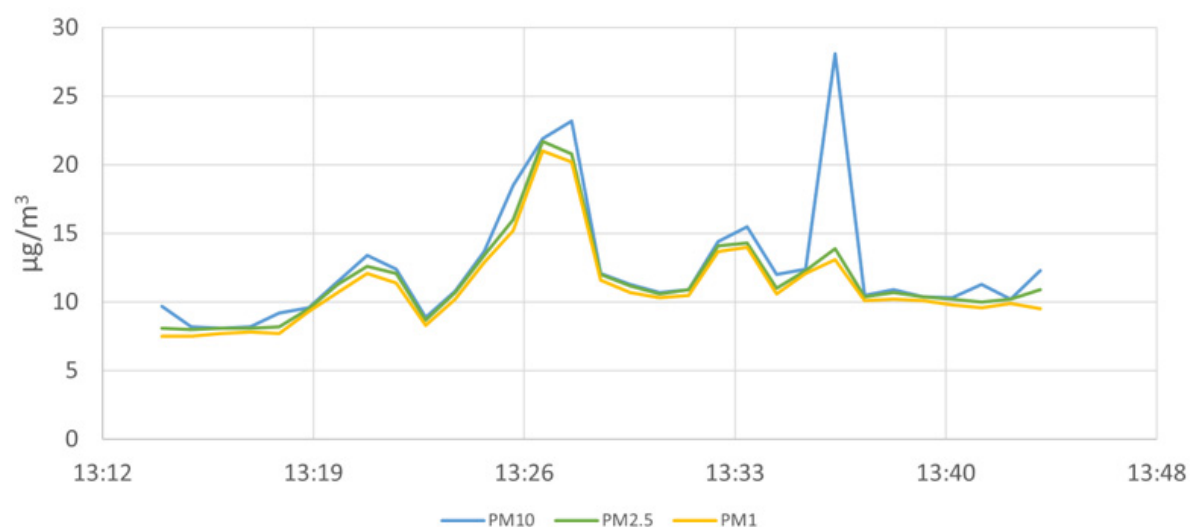

Figure S3. Particulate matter fractions for O3.

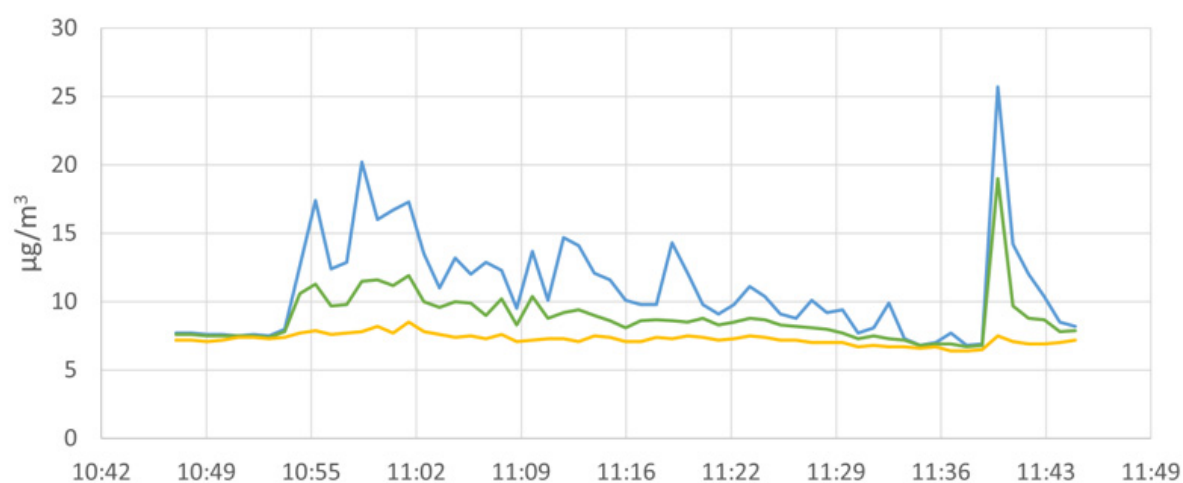

Figure S4. Particulate matter fractions for O4.

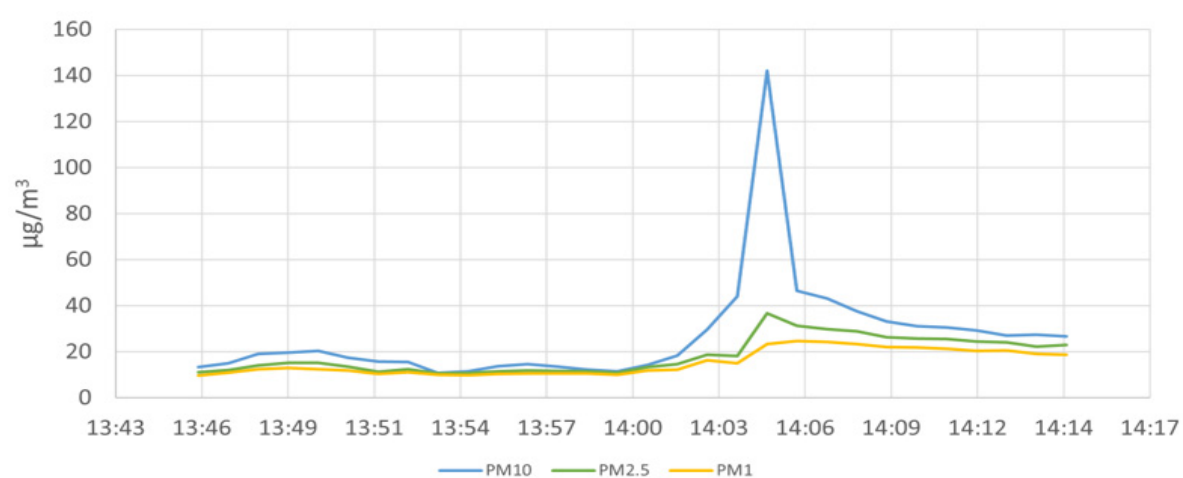

Figure S5. Particulate matter fractions for O5.

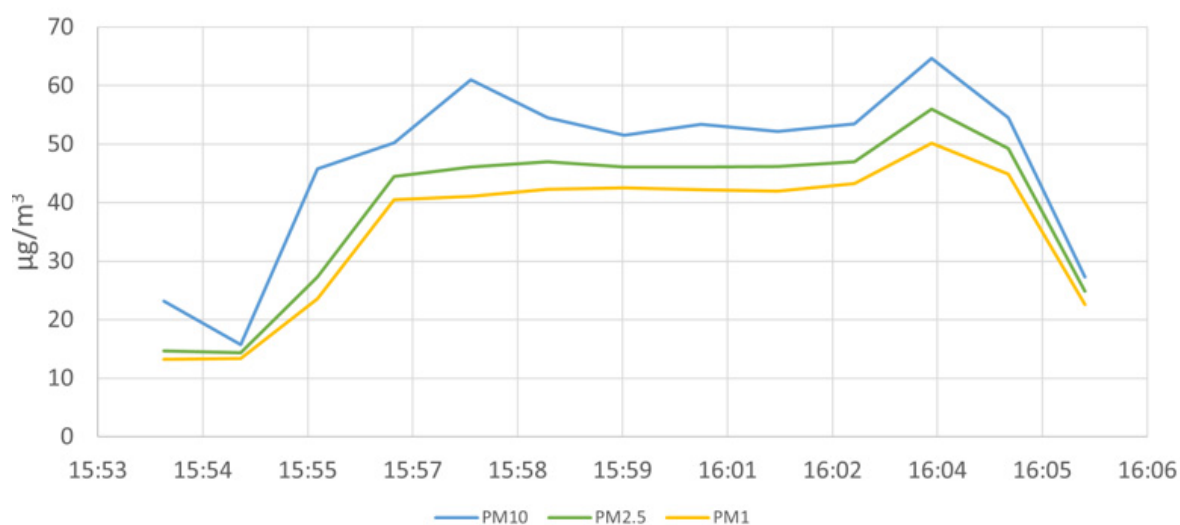

Figure S6. Particulate matter fractions for O6.

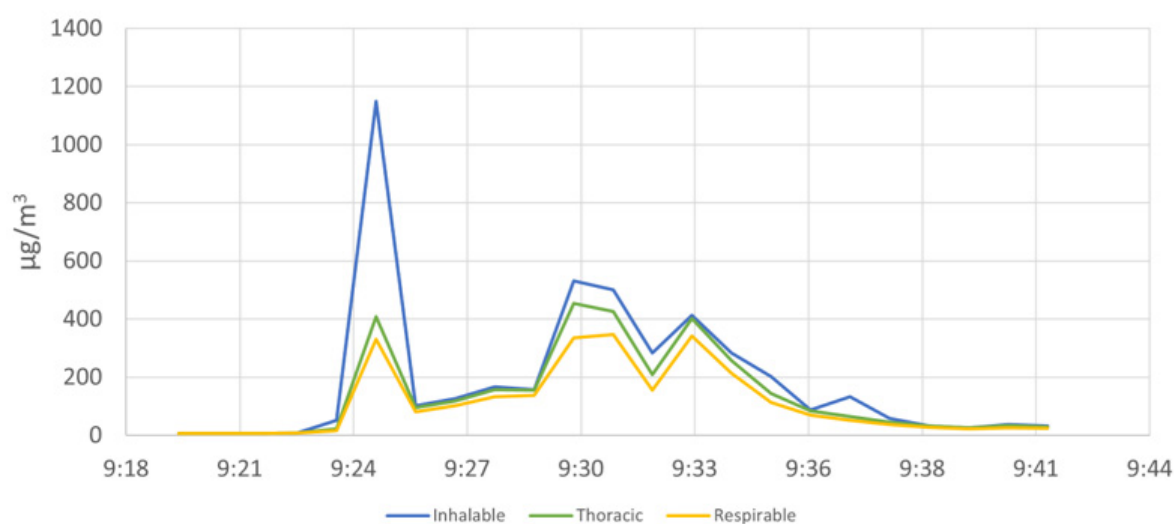

Figure S7. Inhalable, thoracic, and respirable fractions for O1.

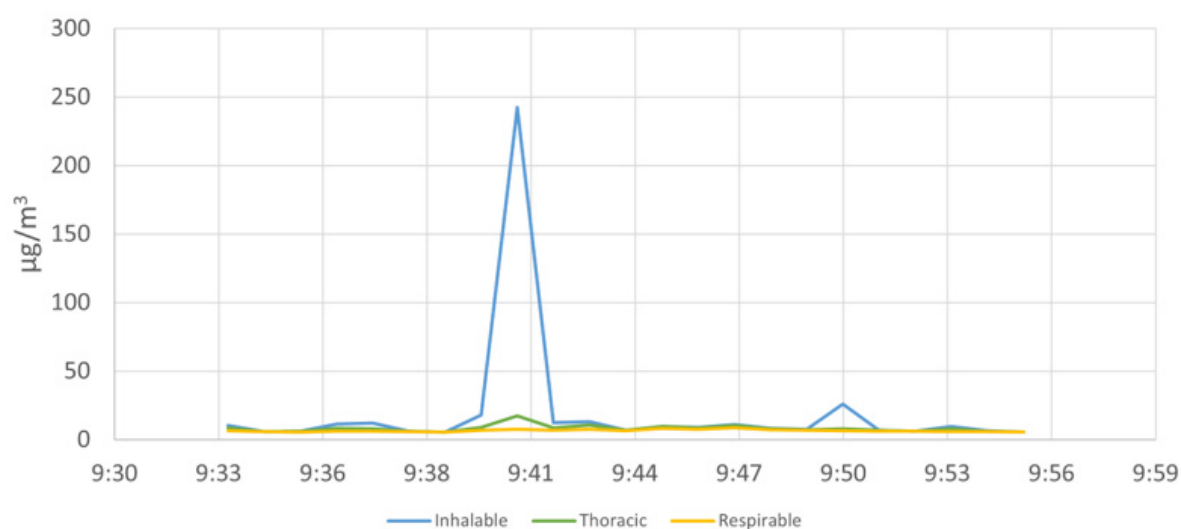

**Figure S8.** Inhalable, thoracic, and respirable fractions for O2.

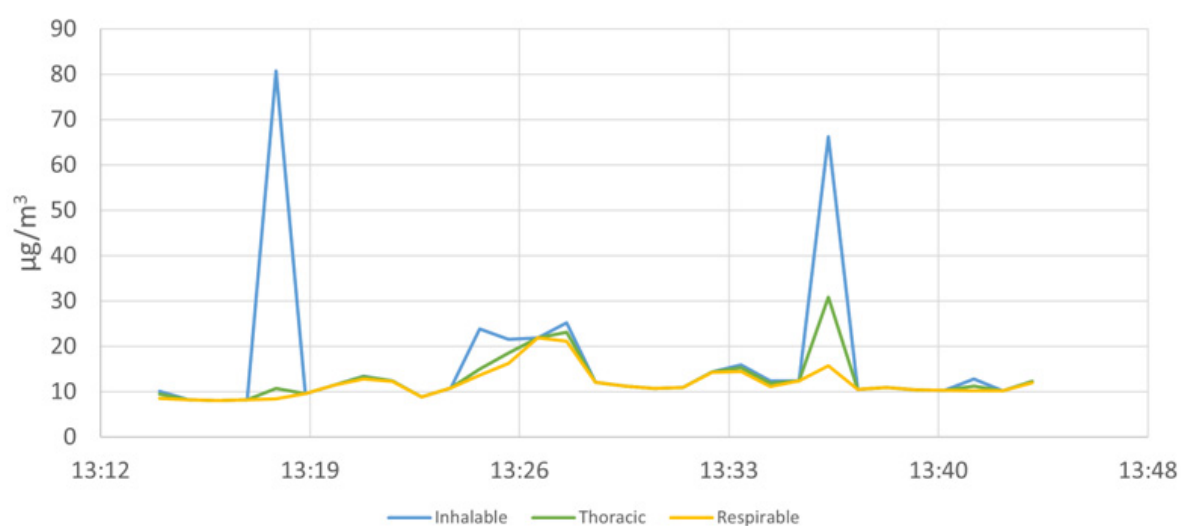

**Figure S9.** Inhalable, thoracic, and respirable fractions for O3.

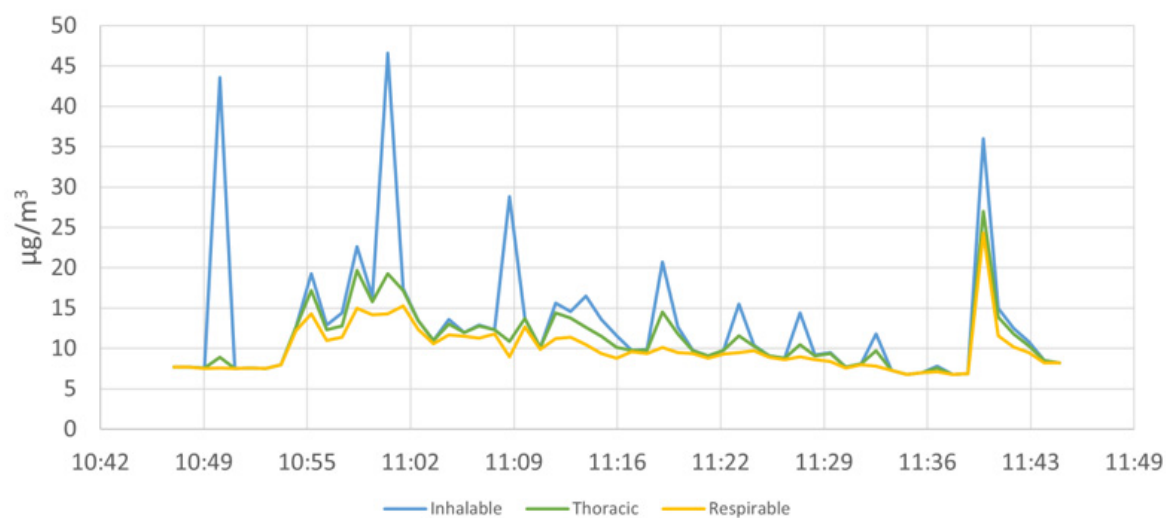

Figure S10. Inhalable, thoracic, and respirable fractions for O4.

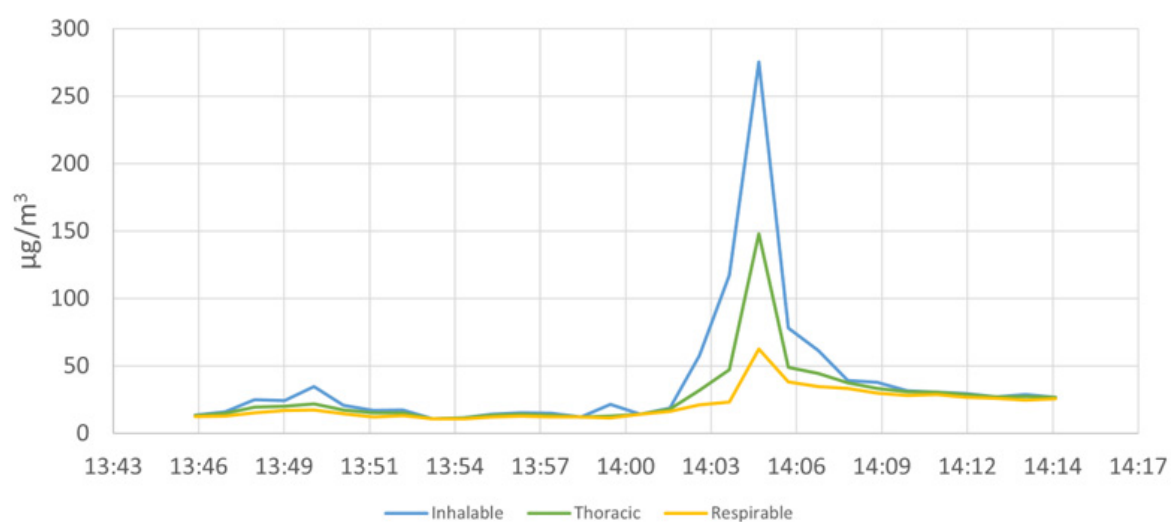

Figure S11. Inhalable, thoracic, and respirable fractions for O5.

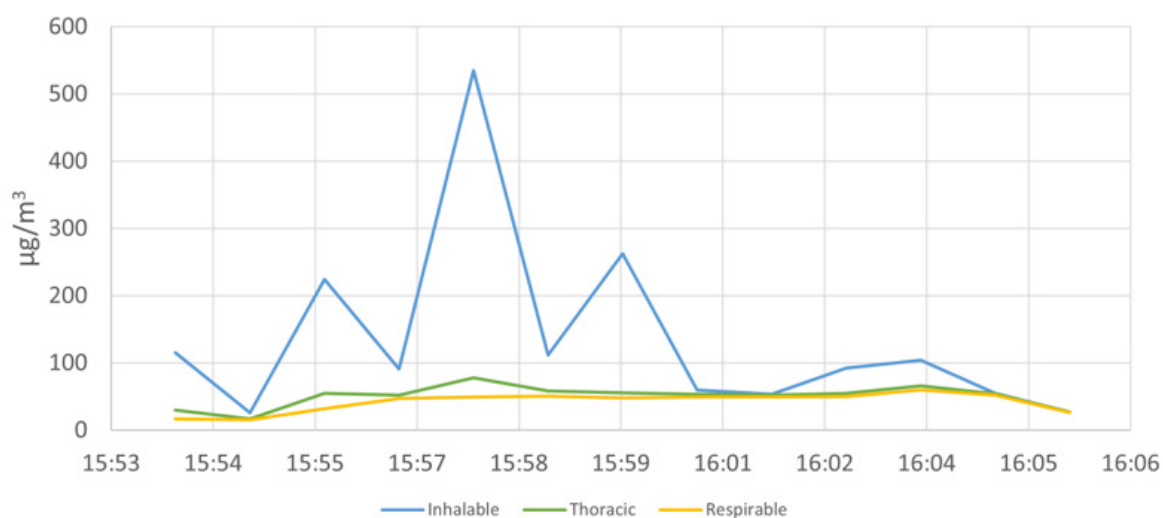

**Figure S12.** Inhalable, thoracic, and respirable fractions for O6.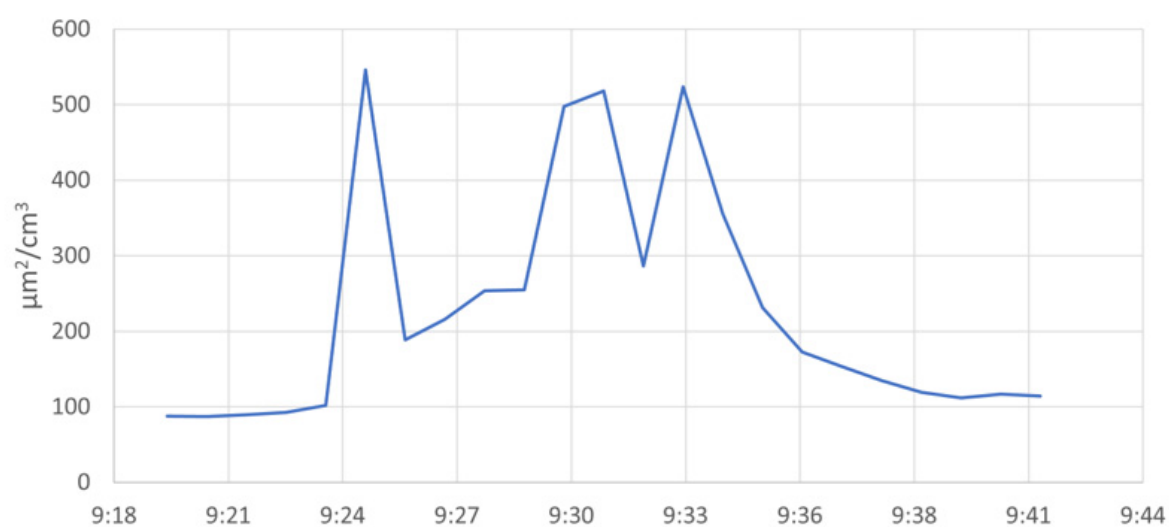**Figure S13.** LDSA for O1.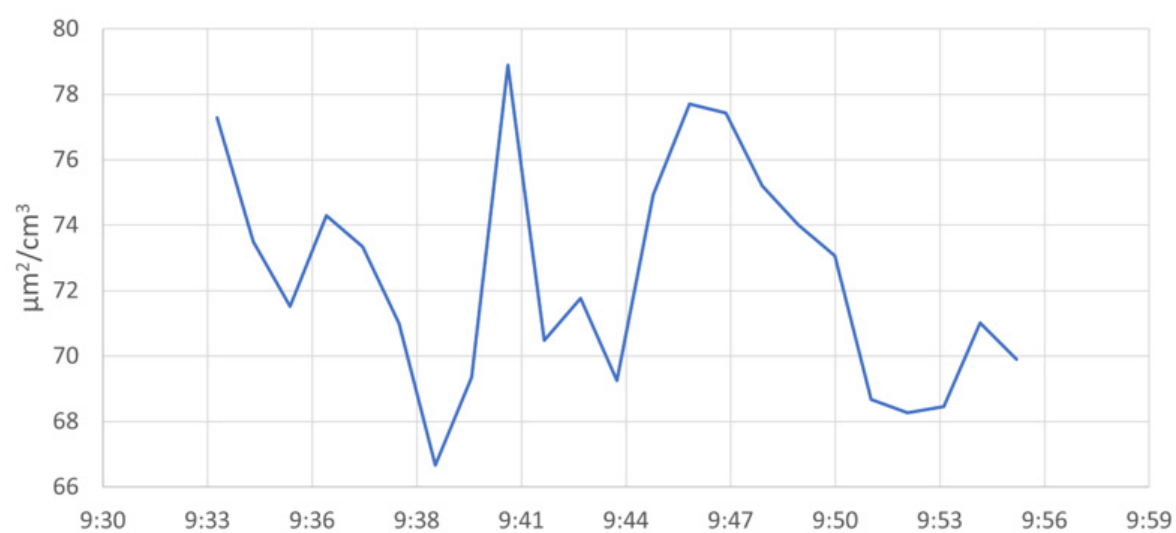**Figure S14.** LDSA for O2.

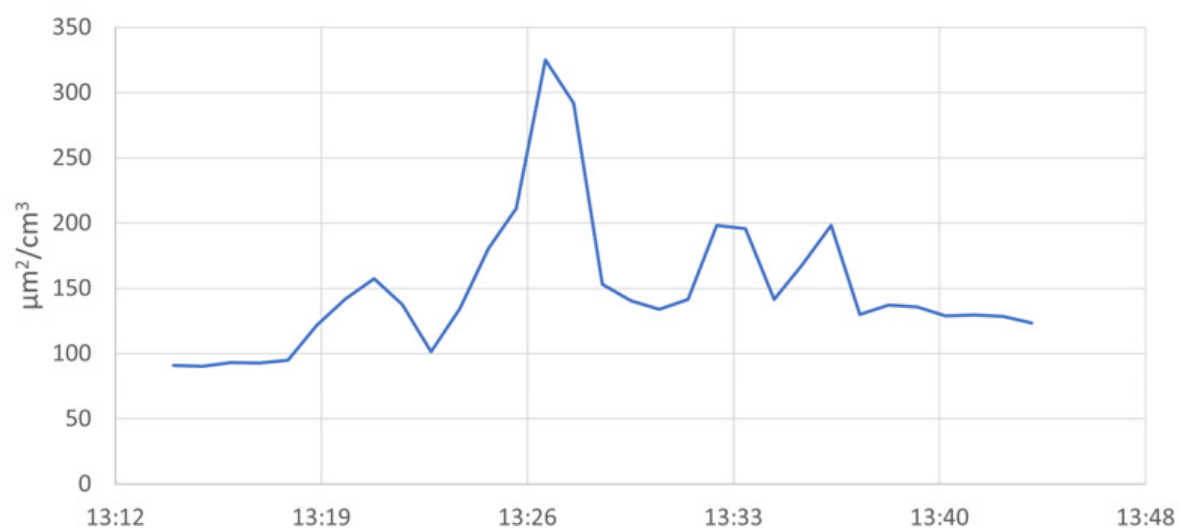

Figure S15. LDSA for O3.

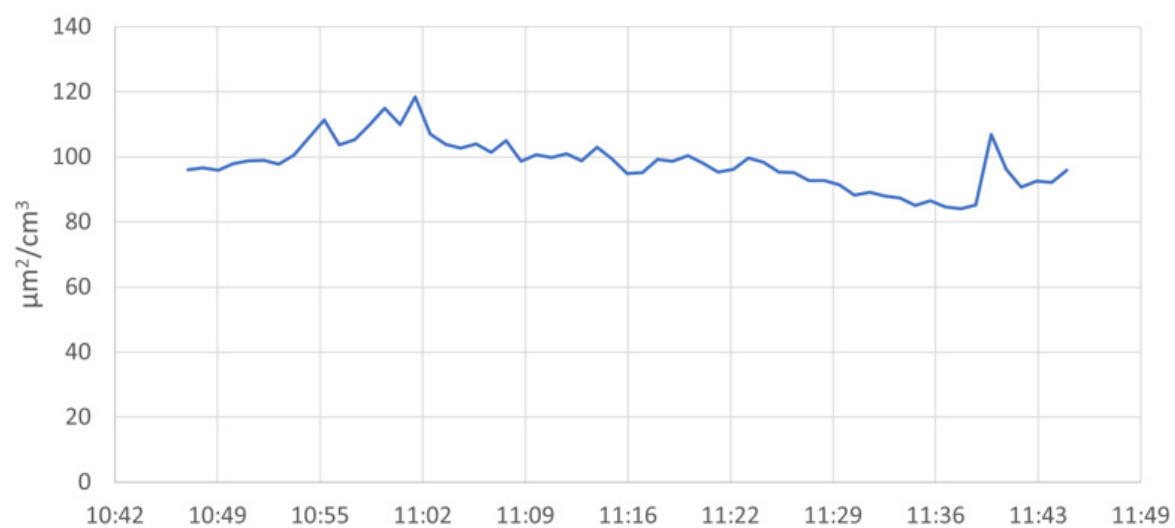

Figure S16. LDSA for O4.

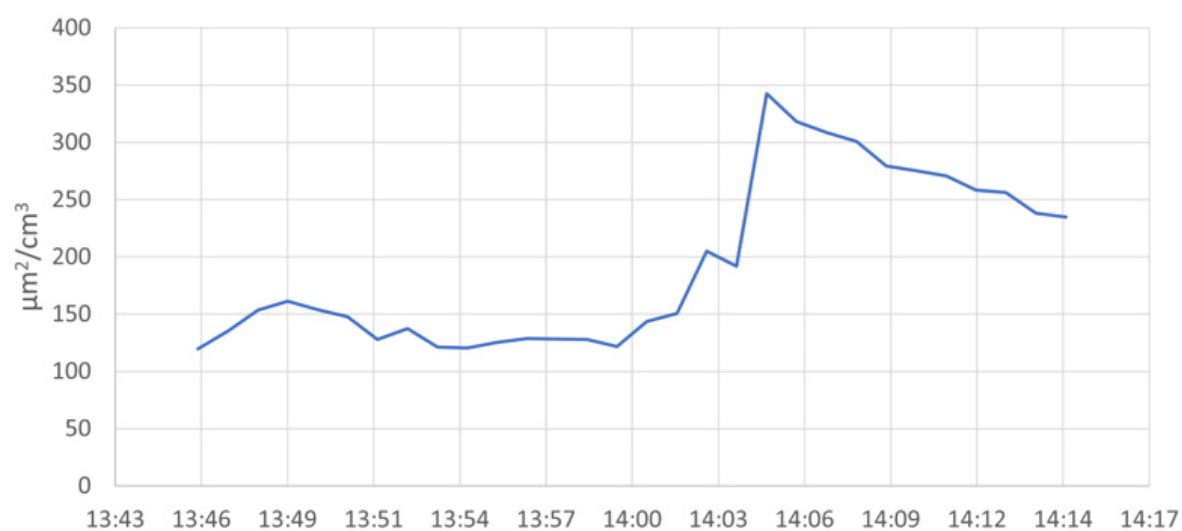

Figure S17. LDSA for O5.

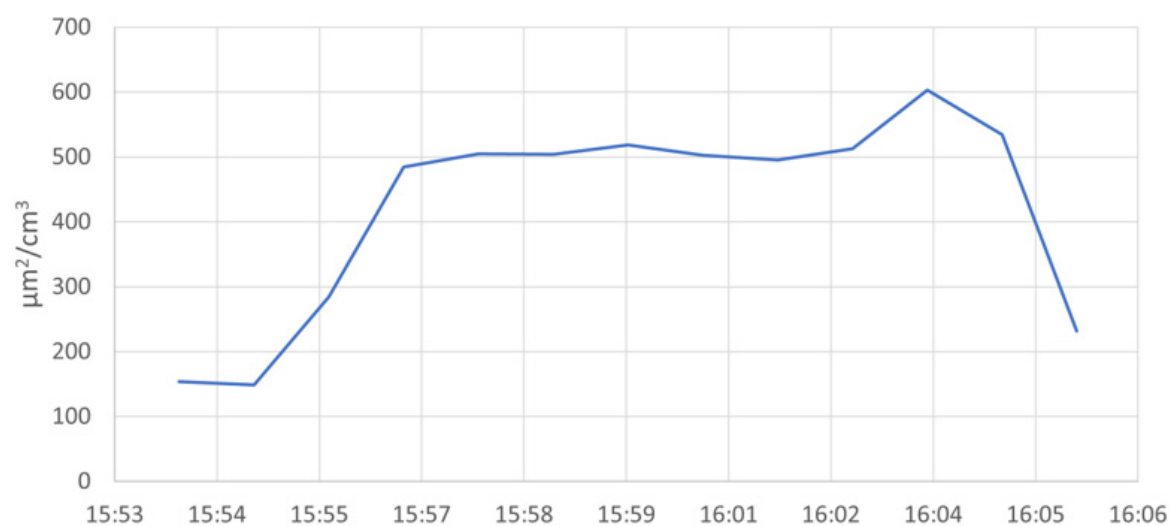

Figure S18. LDSA for O6.
